# Supplementary material for: Modulatory effect of n-3 polyunsaturated fatty acids on depressive-like behaviors in rats with chronic sleep deprivation: potential involvement of melatonin receptor pathway and brain lipidome
Source: Royal Society of Chemistry journal article supplement (doi:10.1039/d3fo01452e), 2023-01-01

**Supplementary Table 1. Diet composition of different treatment groups.**

| Ingredients (g/kg diet) | Normal diet | EPA-rich diet | DHA-rich diet |
|-------------------------|-------------|---------------|---------------|
|                         | C, S, SR    | SRE           | SRD           |
| Casein                  | 140.0       | 140.0         | 140.0         |
| L-cystine               | 1.80        | 1.80          | 1.80          |
| Corn starch             | 465.7       | 465.7         | 465.7         |
| Dextrinized corn starch | 155.0       | 155.0         | 155.0         |
| Sucrose                 | 100.0       | 100.0         | 100.0         |
| Cellulose               | 50.0        | 50.0          | 50.0          |
| Soybean oil             | 40.0        | 20.0          | 20.0          |
| EPA-rich oil            | -           | 20.0          | -             |
| DHA-rich oil            | -           | -             | 20.0          |
| t-Butylhydroquinone     | 0.008       | 0.008         | 0.008         |
| AIN-93M mineral mix     | 35.0        | 35.0          | 35.0          |
| AIN-93 vitamin mix      | 10.0        | 10.0          | 10.0          |
| Choline bitartrate      | 2.50        | 2.50          | 2.50          |

C, control; S, sleep deprivation; SR, sleep deprivation treated with RMT; SRE, sleep deprivation treated with RMT and EPA; SRD, sleep deprivation treated with RMT and DHA. EPA, eicosapentaenoic acid; DHA, docosahexaenoic acid; AIN, American Institute of Nutrition.

**Supplementary Table 2. EPA and DHA content of different fish oil.**

| Ingredients (mg/g) | EPA-rich oil | DHA-rich oil |
|--------------------|--------------|--------------|
| EPA                | 800          | 3            |
| DHA                | 2            | 700          |

EPA, eicosapentaenoic acid; DHA, docosahexaenoic acid.

**Supplementary Table3: The sequences of primers.**

| Genes | Primer sequence (5'→3')   | bp  |
|-------|---------------------------|-----|
| MT1   | F: TTCCCTGTGCTACGTGTTCC   | 122 |
|       | R: TGACGGACTGGGTGAAGGTA   |     |
| MT2   | F: GGCCATTCTCCATGACGGTT   | 131 |
|       | R: AGATGCACCAGTAGCGGTTG   |     |
| BDNF  | F: CGCTTTTTCTAGCTCTGTGGTG | 143 |
|       | R: CCGTGGACGTTTGCTTCTTTC  |     |
| SOD1  | F: TGCTTTTTGCTCTCCCAGGT   | 120 |
|       | R: CTGCTCGAAGTGAATGACGC   |     |
| SOD2  | F: GGGATTGATGTGTGGGAGCA   | 138 |
|       | R: GGAAGGGCTTCACTTCTTGC   |     |
| CAT   | F: CCCTCAGAAACCCGATGTCC   | 134 |
|       | R: CAAAGTGTGCCATCTCGTCG   |     |
| GPX1  | F: AGTGCGAGGTGAATGGTGAG   | 125 |
|       | R: CACCGGGACCAAATGATGT    |     |
| GAPDH | F: GTGCCAGCCTCGTCTCATAG   | 122 |
|       | R: CGTTGATGGCAACAATGTCCA  |     |

MT1, melatonin receptor 1; MT2, melatonin receptor 2; BDNF, brain-derived neurotrophic factor; SOD, superoxide dismutase; CAT, catalase; GPX, glutathione peroxidase; GAPDH, glyceraldehyde-3-phosphate dehydrogenase; bp, base pair.

**Supplementary Table 4. Summary of potential biomarkers of sleep deprivation induced anxiety-like behaviors.**

| Lipid metabolites | Group S/C |         | Group SR/S |         | Group SRE/S |         | Group SRD/S |         |
|-------------------|-----------|---------|------------|---------|-------------|---------|-------------|---------|
|                   | FC        | p value | FC         | p value | FC          | p value | FC          | p value |
| NAE 18:1          | 2.62      | 0.04    | 0.95       | 0.80    | 0.74        | 0.19    | 0.99        | 0.94    |
| Oleamide          | 0.62      | 0.02    | 1.11       | 0.53    | 1.11        | 0.29    | 1.27        | 0.05    |
| PA 34:0           | 0.79      | 0.01    | 1.02       | 0.78    | 1.16        | 0.06    | 1.14        | 0.07    |
| PC 44:12          | 0.51      | 0.02    | 0.32       | 0.00    | 0.51        | 0.02    | 0.48        | 0.01    |
| PC 48:2           | 1.68      | 0.03    | 0.26       | 0.00    | 0.40        | 0.01    | 0.27        | 0.00    |
| PC O-32:2         | 0.55      | 0.01    | 1.41       | 0.01    | 1.15        | 0.18    | 0.82        | 0.15    |
| PC O-44:1         | 0.57      | 0.04    | 0.58       | 0.04    | 0.58        | 0.03    | 0.47        | 0.01    |
| PE 32:4           | 0.55      | 0.00    | 2.71       | 0.00    | 2.91        | 0.00    | 1.15        | 0.31    |
| PE 40:4           | 3.51      | 0.00    | 0.72       | 0.12    | 0.66        | 0.06    | 0.75        | 0.17    |
| PE-NMe2 40:6      | 0.62      | 0.04    | 1.82       | 0.00    | 2.22        | 0.00    | 2.49        | 0.00    |
| PS 40:0           | 0.74      | 0.02    | 1.52       | 0.01    | 1.75        | 0.00    | 1.28        | 0.16    |
| PS 40:4           | 1.31      | 0.01    | 1.21       | 0.36    | 0.78        | 0.01    | 0.60        | 0.00    |
| PS 41:6           | 0.66      | 0.01    | 1.14       | 0.39    | 0.91        | 0.50    | 1.12        | 0.44    |
| PS 42:6           | 0.43      | 0.00    | 2.43       | 0.00    | 2.04        | 0.01    | 0.13        | 0.01    |
| PS 44:10          | 0.48      | 0.00    | 2.63       | 0.00    | 3.58        | 0.00    | 1.26        | 0.26    |
| CL 60:4           | 1.60      | 0.03    | 0.18       | 0.00    | 0.07        | 0.00    | 0.10        | 0.00    |
| Cer 34:0;O2       | 4.04      | 0.01    | 0.34       | 0.02    | 0.26        | 0.01    | 1.00        | 0.99    |
| SHexCer 38:1;O2   | 0.48      | 0.00    | 1.03       | 0.90    | 4.68        | 0.00    | 6.22        | 0.00    |
| SHexCer 40:1;O2   | 2.71      | 0.04    | 1.15       | 0.53    | 0.90        | 0.69    | 1.47        | 0.14    |
| GA2 36:2;O2       | 3.91      | 0.00    | 1.10       | 0.64    | 0.89        | 0.61    | 1.61        | 0.13    |
| GM3 36:1;O2       | 1.88      | 0.00    | 0.50       | 0.12    | 0.44        | 0.00    | 0.51        | 0.00    |
| MG 16:0           | 1.33      | 0.02    | 0.75       | 0.01    | 0.66        | 0.00    | 0.59        | 0.00    |
| MG 18:3           | 0.69      | 0.02    | 1.98       | 0.00    | 2.37        | 0.00    | 1.37        | 0.07    |
| DG 30:0           | 2.13      | 0.01    | 0.40       | 0.00    | 0.38        | 0.00    | 0.50        | 0.01    |
| DG 36:1           | 0.74      | 0.03    | 1.55       | 0.07    | 1.53        | 0.01    | 1.30        | 0.23    |
| DG 38:8           | 1.93      | 0.01    | 0.91       | 0.72    | 0.75        | 0.42    | 1.15        | 0.71    |
| DG 40:6           | 1.51      | 0.02    | 0.63       | 0.01    | 1.15        | 0.31    | 1.18        | 0.42    |
| DG 42:6           | 1.50      | 0.04    | 0.77       | 0.21    | 0.63        | 0.03    | 0.52        | 0.01    |
| DG 48:1           | 0.18      | 0.01    | 2.39       | 0.15    | 2.69        | 0.01    | 3.87        | 0.00    |
| TG 60:8           | 0.65      | 0.05    | 0.43       | 0.03    | 0.27        | 0.01    | 0.33        | 0.01    |
| TG 62:4           | 0.49      | 0.01    | 1.37       | 0.25    | 1.89        | 0.01    | 1.31        | 0.34    |

C, control; S, sleep deprivation; SR, sleep deprivation treated with RMT; SRE, sleep deprivation treated with RMT and EPA; SRD, sleep deprivation treated with RMT and DHA. FC, fold change; NAE, N-acyl ethanolamines (endocannabinoids); PA, phosphatidic acid; PC, phosphatidylcholine; PE, phosphatidylethanolamine; PS, phosphatidylserine; CL, cardiolipin; Cer, ceramide; SHexCer, sulfohexosylceramide; MG, monoacylglycerol; DG, diacylglycerol; TG, triacylglycerol. Lipid metabolites with fold change >2 and <0.5 are highlighted in yellow and blue, respectively.  $P < 0.05$  shows significant differences. C: n=5; S: n=5; SR: n=5; SRE: n=5; SRD: n=5.

**Supplementary Table 5. Summary of potential biomarkers of sleep deprivation induced depression-like behaviors.**

| Lipid metabolites | Group S/C |         | Group SR/S |         | Group SRE/S |         | Group SRD/S |         |
|-------------------|-----------|---------|------------|---------|-------------|---------|-------------|---------|
|                   | FC        | p value | FC         | p value | FC          | p value | FC          | p value |
| FA 5:2;O2         | 0.31      | 0.01    | 5.43       | 0.00    | 7.76        | 0.00    | 1.83        | 0.08    |
| PC 44:2           | 0.71      | 0.02    | 0.99       | 0.96    | 0.87        | 0.23    | 0.98        | 0.82    |
| PC 48:2           | 1.68      | 0.03    | 0.26       | 0.00    | 0.40        | 0.01    | 0.27        | 0.00    |
| PE 32:4           | 0.55      | 0.00    | 2.71       | 0.00    | 2.91        | 0.00    | 1.15        | 0.31    |
| PE 40:4           | 3.51      | 0.00    | 0.72       | 0.12    | 0.66        | 0.06    | 0.75        | 0.17    |
| PS 42:6           | 0.43      | 0.00    | 2.43       | 0.00    | 2.04        | 0.01    | 0.13        | 0.01    |
| PS 44:10          | 0.48      | 0.00    | 2.63       | 0.00    | 3.58        | 0.00    | 1.26        | 0.26    |
| CL 52:0           | 0.71      | 0.01    | 0.66       | 0.04    | 0.77        | 0.08    | 0.69        | 0.10    |
| CL 60:4           | 1.60      | 0.03    | 0.18       | 0.00    | 0.07        | 0.00    | 0.10        | 0.00    |
| Cer 34:0;O2       | 4.04      | 0.01    | 0.34       | 0.02    | 0.26        | 0.01    | 1.00        | 0.99    |
| GM3 32:1;O2       | 0.26      | 0.04    | 1.43       | 0.18    | 2.04        | 0.02    | 1.40        | 0.30    |
| GM3 36:1;O2       | 1.88      | 0.00    | 0.50       | 0.12    | 0.44        | 0.00    | 0.51        | 0.00    |
| MG 18:3           | 0.69      | 0.02    | 1.98       | 0.00    | 2.37        | 0.00    | 1.37        | 0.07    |
| DG 30:0           | 2.13      | 0.01    | 0.40       | 0.00    | 0.38        | 0.00    | 0.50        | 0.01    |
| DG 36:4           | 0.59      | 0.00    | 0.94       | 0.70    | 0.86        | 0.18    | 0.71        | 0.03    |
| DG 40:7           | 1.75      | 0.01    | 0.54       | 0.03    | 0.46        | 0.00    | 1.46        | 0.07    |
| DG 42:6           | 1.50      | 0.04    | 0.77       | 0.21    | 0.63        | 0.03    | 0.52        | 0.01    |
| TG 62:4           | 0.49      | 0.01    | 1.37       | 0.25    | 1.89        | 0.01    | 1.31        | 0.34    |

C, control; S, sleep deprivation; SR, sleep deprivation treated with RMT; SRE, sleep deprivation treated with RMT and EPA; SRD, sleep deprivation treated with RMT and DHA. FC, fold change; FA, fatty acid; PC, phosphatidylcholine; PE, phosphatidylethanolamine; PS, phosphatidylserine; CL, cardiolipin; Cer, ceramide; MG, monoacylglycerol; DG, diacylglycerol; TG, triacylglycerol. Lipid metabolites with fold change >2 and <0.5 are highlighted in yellow and blue, respectively.  $P < 0.05$  shows significant differences. C: n=5; S: n=5; SR: n=5; SRE: n=5; SRD: n=5.

**Supplementary Figure 1. Overview of identified lipid specie**

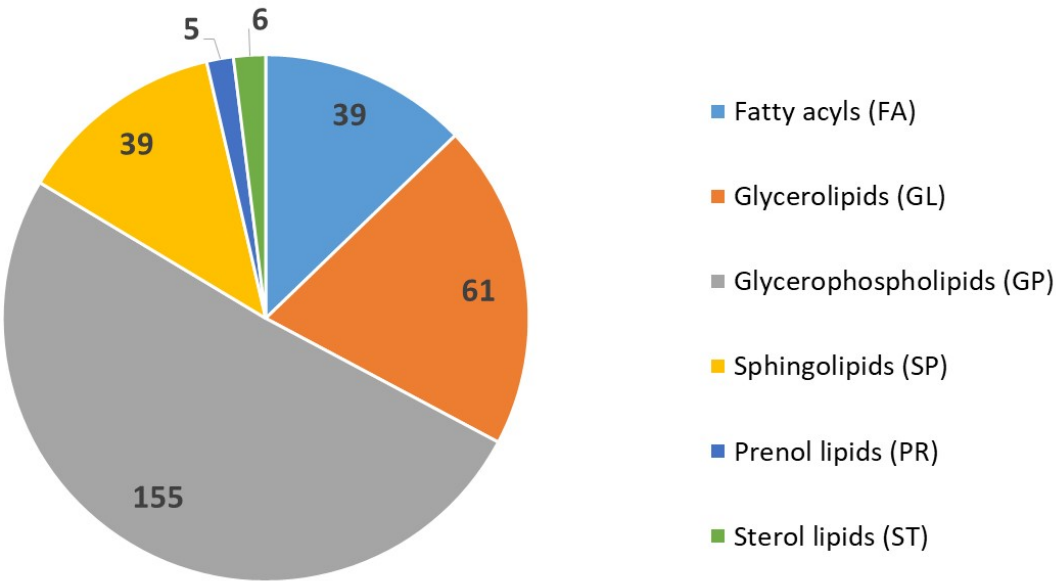

Supplement: d3fo01452e1.pdf [file d3fo01452e1.pdf]
